# Supplementary material for: Which Dermatological Conditions Present to an Emergency Department in Australia?
Source: Hindawi journal article supplement (doi:10.1155/2014/463026), 2014-01-01
Supplement: f1 [file 463026.f1.pdf]

**Appendix A:**

Keywords used to select dermatological presentations from the 'Presenting Complaint' and 'Triage notes' fields of the VEMD.

- Urticaria, angioedema, flushing, induration, hives
- Skin infections, cellulitis, impetigo, herpes, abscess, furuncle, carbuncle, varicella, chickenpox, hand foot and mouth, viral exanthum, warts, syphilis, candidiasis, erysipelas, scabies, measles, mumps, rubella, folliculitis, pseudofolliculitis
- Rash, erythema, maculopapular
- Eczema, dermatitis, lichen simplex chronicus
- Skin reactions, drug reaction, allergy
- Lymphadenitis
- Granulomas
- Myxoedema
- Prurigo
- Bites, stings, itch
- Vesicle, blister
- Ulcer
- Frostbite
- Psoriasis
- Behcet's
- Bullous, pemphigus, pemphigoid
- Lupus
- Pityriasis
- Steven Johnson syndrome
- Nail
- Sweat glands
- Seborrhoea/ seborrheic
- Mucosal rash/ ulcer
- Acne
- Skin cancer, melanoma
- Cyst
- Sunburn
- Corn
- Bunion

## Appendix B:

Selected emergency ICD10 codes used to select dermatological presentations to ED

| ICD-10-AM<br>7 <sup>th</sup> | Full ICD-10-AM 7th edition description                                        | VEMD description                                                                               |
|------------------------------|-------------------------------------------------------------------------------|------------------------------------------------------------------------------------------------|
| A630                         | Anogenital (venereal) warts                                                   | Genital warts                                                                                  |
| A6300                        | Anogenital (venereal) warts, unspecified site                                 | Anogenital (venereal) warts, unspecified site                                                  |
| A6301                        | Perianal (venereal) warts                                                     | Perianal (venereal) warts                                                                      |
| A6302                        | Cervical (venereal) warts                                                     | Cervical (venereal) warts                                                                      |
| A6303                        | Urethral (venereal) warts                                                     | Urethral (venereal) warts                                                                      |
| A6304                        | Vaginal (venereal) warts                                                      | Vaginal (venereal) warts                                                                       |
| A6305                        | Vulval (venereal) warts                                                       | Vulval (venereal) warts                                                                        |
| A6306                        | Penile (venereal) warts                                                       | Penile (venereal) warts                                                                        |
| A6307                        | Scrotal (venereal) warts                                                      | Scrotal (venereal) warts                                                                       |
| A6309                        | Anogenital (venereal) warts, other site                                       | Anogenital (venereal) warts, other site                                                        |
| B000                         | Eczema herpeticum                                                             | Eczema herpeticum                                                                              |
| B001                         | Herpesviral vesicular dermatitis                                              | Cold sore / Herpesviral vesicular dermatitis                                                   |
| B019                         | Varicella without complication                                                | Chickenpox / Varicella                                                                         |
| B029                         | Zoster without complication                                                   | Herpes zoster infection (includes shingles)                                                    |
| B059                         | Measles without complication                                                  | Measles                                                                                        |
| B069                         | Rubella without complication                                                  | Rubella / German measles                                                                       |
| B07                          | Viral warts                                                                   | Viral warts                                                                                    |
| B081                         | Molluscum contagiosum                                                         | Molluscum contagiosum                                                                          |
| B084                         | Enteroviral vesicular stomatitis with exanthem                                | Hand, foot and mouth disease                                                                   |
| B09                          | Unspecified viral infection characterised by skin and mucous membrane lesions | Exanthema, viral                                                                               |
| B269                         | Mumps without complication                                                    | Mumps / Parotitis                                                                              |
| B279                         | Infectious mononucleosis, unspecified                                         | Mononucleosis, infectious                                                                      |
| B349                         | Viral infection, unspecified                                                  | Viral infection                                                                                |
| B350                         | Tinea barbae and tinea capitis                                                | Tinea capitis / Tinea barbae                                                                   |
| B353                         | Tinea pedis                                                                   | Fungal foot infection / Tinea pedis / Athlete's foot / Dermatophytosis of foot / Foot ringworm |
| B359                         | Dermatophytosis, unspecified                                                  | Ringworm / Dermatophytosis                                                                     |
| B360                         | Pityriasis versicolor                                                         | Tinea versicolor                                                                               |
| B373                         | Candidiasis of vulva and vagina (N77.1*)                                      | Candidiasis, vulval or vagina / Vaginal thrush                                                 |
| B379                         | Candidiasis, unspecified                                                      | Candidiasis, NEC                                                                               |
| B49                          | Unspecified mycosis                                                           | Fungal infection / Fungaemia / Mycosis                                                         |
| B839                         | Helminthiasis, unspecified                                                    | Worms / Helminthiasis                                                                          |
| B852                         | Pediculosis, unspecified                                                      | Lice infestation / Pediculosis                                                                 |
| B86                          | Scabies                                                                       | Scabies                                                                                        |
| B89                          | Unspecified parasitic disease                                                 | Parasitic disease, unspecified                                                                 |
| D179                         | Benign lipomatous neoplasm, unspecified                                       | Lipoma                                                                                         |
| D1800                        | Haemangioma, unspecified site                                                 | Haemangioma / Lymphangioma                                                                     |
| D485                         | Neoplasm of uncertain or unknown behaviour of skin                            | Neoplasm, skin                                                                                 |
| D690                         | Allergic purpura                                                              | Henoch-Schonlein purpura / Allergic purpura                                                    |
| I776                         | Arteritis, unspecified                                                        | Vasculitis                                                                                     |
| I800                         | Phlebitis and thrombophlebitis of superficial vessels of lower extremities    | Superficial embolism/thrombosis/venous thrombophlebitis of lower limb                          |

|       |                                                              |                                                                                   |
|-------|--------------------------------------------------------------|-----------------------------------------------------------------------------------|
| I801  | Phlebitis and thrombophlebitis of femoral vein               | Femoropopliteal phlebitis                                                         |
| L010  | Impetigo [any organism] [any site]                           | Impetigo                                                                          |
| L029  | Cutaneous abscess, furuncle and carbuncle, unspecified       | Boil / Furunculosis / Abscess, skin, any site                                     |
| L0301 | Cellulitis of finger                                         | Onychia, finger / Cellulitis, finger / Paronychia, finger                         |
| L0302 | Cellulitis of toe                                            | Onychia, toe / Cellulitis, toe / Paronychia, toe                                  |
| L0311 | Cellulitis of lower limb                                     | Cellulitis, leg (excludes cellulitis of toe: L0302)                               |
| L039  | Cellulitis, unspecified                                      | Cellulitis, skin (excludes cellulitis of leg: L0311, toe: L0302 or finger: L0301) |
| L050  | Pilonidal cyst with abscess                                  | Pilonidal cyst, fistula or sinus with abscess                                     |
| L059  | Pilonidal cyst without abscess                               | Pilonidal cyst, fistula or sinus without abscess                                  |
| L089  | Local infection of skin and subcutaneous tissue, unspecified | Skin infection                                                                    |
| L209  | Atopic dermatitis, unspecified                               | Atopic eczema / Dermatitis                                                        |
| L219  | Seborrhoeic dermatitis, unspecified                          | Dermatitis, seborrhoeic                                                           |
| L22   | Diaper [napkin] dermatitis                                   | Nappy rash                                                                        |
| L258  | Unspecified contact dermatitis due to other agents           | Dermatitis, contact, due to other agents                                          |
| L270  | Generalised skin eruption due to drugs and medicaments       | Rash, drug, generalised                                                           |
| L271  | Localised skin eruption due to drugs and medicaments         | Rash, drug, localized                                                             |
| L272  | Dermatitis due to ingested food                              | Dermatitis due to ingested food                                                   |
| L299  | Pruritus, unspecified                                        | Pruritus                                                                          |
| L309  | Dermatitis, unspecified                                      | Dermatitis / Eczema, NEC (includes allergic reaction to plants)                   |
| L409  | Psoriasis, unspecified                                       | Psoriasis                                                                         |
| L42   | Pityriasis rosea                                             | Pityriasis rosea                                                                  |
| L509  | Urticaria, unspecified                                       | Urticaria                                                                         |
| L519  | Erythema multiforme, unspecified                             | Erythema multiforme                                                               |
| L539  | Erythematous condition, unspecified                          | Erythema                                                                          |
| L559  | Sunburn, unspecified                                         | Sunburn Unspecified                                                               |
| L600  | Ingrowing nail                                               | Ingrowing nail of finger or toe                                                   |
| L659  | Nonscarring hair loss, unspecified                           | Alopecia                                                                          |
| L721  | Trichilemmal cyst                                            | Sebaceous cyst                                                                    |
| L740  | Miliaria rubra                                               | Heat rash                                                                         |
| L899  | Decubitus ulcer and pressure area, unspecified               | Bedsore / Decubitus ulcer                                                         |
| L989  | Disorder of skin and subcutaneous tissue, unspecified        | Skin or subcutaneous tissue disorder NOS                                          |
| M329  | Systemic lupus erythematosus, unspecified                    | Systemic lupus erythematosus                                                      |
| M359  | Systemic involvement of connective tissue, unspecified       | Other diffuse connective tissue disorder                                          |
| M7999 | Unspecified soft tissue disorder, site unspecified           | Soft tissue disorder unspecified                                                  |
| N750  | Cyst of Bartholin's gland                                    | Cyst of Bartholin's gland                                                         |
| N751  | Abscess of Bartholin's gland                                 | Abscess of Bartholin's gland                                                      |
| N760  | Acute vaginitis                                              | Vaginal infection                                                                 |
| N762  | Acute vulvitis                                               | Vulval infection                                                                  |

|      |                                                                                              |                                                                                      |
|------|----------------------------------------------------------------------------------------------|--------------------------------------------------------------------------------------|
| N764 | Abscess of vulva                                                                             | Abscess of labia or vulva                                                            |
| R21  | Rash and other nonspecific skin eruption                                                     | Rash, non-vesicular (excludes Nappy rash: L22, Urticarial rash: L509)                |
| R229 | Localised swelling, mass and lump, unspecified                                               | Skin lump (excludes Breast lump: N63, Neck lump: R221)                               |
| R233 | Spontaneous ecchymoses                                                                       | Ecchymoses, spontaneous / Petechiae                                                  |
| R238 | Other and unspecified skin changes                                                           | Seborrhoea                                                                           |
| T780 | Anaphylactic shock due to adverse food reaction                                              | Anaphylactic shock, due to adverse food reaction                                     |
| T781 | Other adverse food reactions, not elsewhere classified                                       | Reaction/Allergy to food (other than dermatitis)                                     |
| T782 | Anaphylactic shock, unspecified                                                              | Anaphylactic shock (excludes due to Vaccine: T805 or Food: T780)                     |
| T783 | Angioneurotic oedema                                                                         | Angioneurotic oedema / Giant urticaria / Quicke's oedema                             |
| T784 | Allergy, unspecified                                                                         | Allergy, NEC (excludes to Food: T781, Plants: T887, Vaccine: T806)                   |
| T805 | Anaphylactic shock due to serum                                                              | Anaphylactic shock due to serum/vaccine/immunisation                                 |
| T886 | Anaphylactic shock due to adverse effect of correct drug or medicament properly administered | Anaphylactic shock, due to adverse effect of correct substance properly administered |
| T887 | Unspecified adverse effect of drug or medicament                                             | Reaction to drug, unspecified (excludes anaphylactic shock due to drug: T886)        |
